# Supplementary material
Source: PubMed Central journal article supplement (PMC4334826)
Supplement: supp_dju492_jnci_JNCI_14_0664_s01.pdf [file supp_dju492_jnci_JNCI_14_0664_s01.pdf]

## Supplementary Materials

### Supplementary Methods

#### *Nanostring assay and miRNA microarray analysis*

100 ng of total RNA from frozen tissues were analyzed using NanoString human miRNA v1 assays (NanoString Technologies, Seattle, USA) according to the manufacturer's instructions (NCBIGEO GSE44121). After background subtraction, data was normalized to the geometric mean of the top 75 miRNAs. Paired Student's *t*-test was used to calculate statistical significance. We also analyzed our miRNA microarray expression data (NCBIGEO GSE7828) (1) for miRNA expression in primary tumors that were associated with distant metastases.

#### *MiRNA isolation and Quantitative Real-time Polymerase Chain Reaction (qRT-PCR)*

Total RNA (including miRNA) was extracted from FFPE specimens using the Total Nucleic Acid Isolation Kit for FFPE tissues (Ambion, Austin, TX, USA), as previously described (2, 3). RNA was extracted from frozen tissue specimens using standard Trizol protocols (Invitrogen), as previously described (4). Expression of let-7i, miR-10b, miR-30b, miR-221, miR-320a, and miR-885-5p were analyzed using TaqMan miRNA assays (Applied Biosystems, Foster City, CA), and miR-16 expression was used as an endogenous control for data normalization, as previously described (3).

Small RNAs were isolated from 250  $\mu$ L serum samples from CRC patients using the Qiagen miRNAeasy Kit (Qiagen, Valencia, CA). For normalization of sample-to-sample variation during RNA isolation, 25 fmol of synthetic *C. elegans* miRNA (cel-miR-39, Applied Biosystems) was added to each serum sample as previously described (5). Expression of miR-885-5p was analyzed using TaqMan miRNA assays (Applied Biosystems) as described previously (3).

The average expression levels of serum and tissue miRNAs were normalized against cel-miR-39 and miR-16 using the  $2^{-\Delta C_t}$  method. We selected miR-16 as an endogenous normalization control, because miR-16 expression is often used for normalizing miRNA

expression in FFPE tissues, as reported previously (3, 5). Differences between groups were presented as  $\Delta C_t$ , which indicate the difference between  $C_t$  values of the miRNA of interest and the  $C_t$  value of the normalizer miRNA.

#### *In Situ Hybridization (ISH) analysis*

Five micrometer thick FFPE tissue sections were hybridized with the let-7i, miR-10b, and miR-885-5p probes (LNA-modified and 5'- and 3'-DIG-labeled oligonucleotide, Exiqon, Woburn, Massachusetts, USA), respectively, as described previously (3). To ensure a fair comparison between all categories of tissues analyzed by ISH (stage I-III CRC vs. stage IV CRC and CRC vs. LM), all tissue sections were processed at the same time in parallel, to eliminate any batch variations that could be introduced by staining at different time points. Positive controls (U6 snRNA, LNA-modified and 5'- and 3'-DIG-labeled oligonucleotide, Exiqon) and negative controls (scrambled miRNA control, LNA-modified and 5'- and 3'-DIG-labeled oligonucleotide, Exiqon) were included in each hybridization procedure as previously described (3).

**Supplementary Figure 1: Study design and outline**

Discovery of CRC metastasis-specific miRNAs was conducted by Nanostring analysis in matching pCRCs and LM tissue cohort. Subsequently, identified miRNAs were quantitatively validated using qRT-PCR in an independent cohort of matching pCRCs and LM tissues. Clinical relevance of prioritized miRNAs was evaluated by miRNA microarray and qRT-PCR in independent matching pCRC and adjacent non-tumor tissue cohorts as well as matching CRC tissue and serum cohorts, respectively. Pathologic expression patterns of miRNAs were confirmed by ISH. LM = liver metastasis; pCRC = primary CRC; ISH = in situ hybridization.

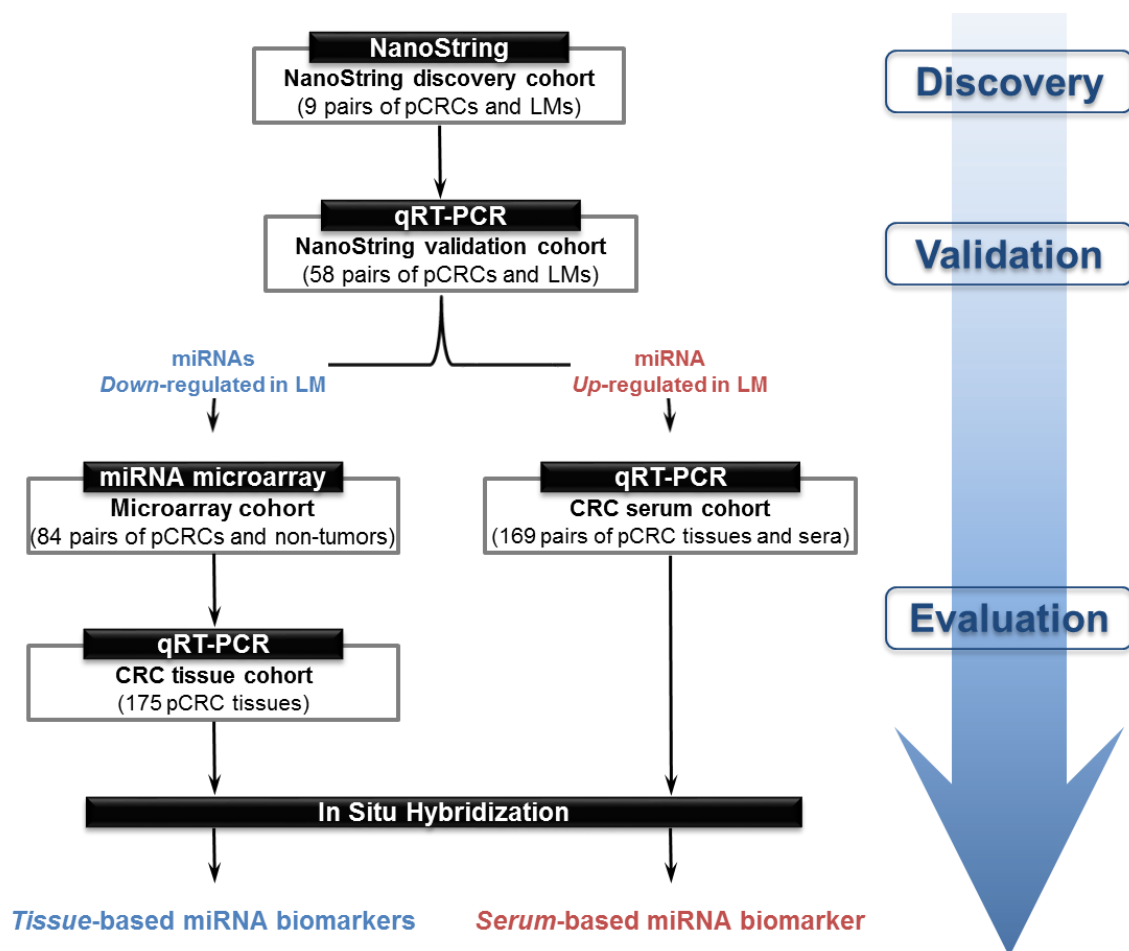

**Supplementary Figure 2:** Disease-free survival analyses based on combination let-7i and miR-10b in CRC tissue cohort (stage I-III).

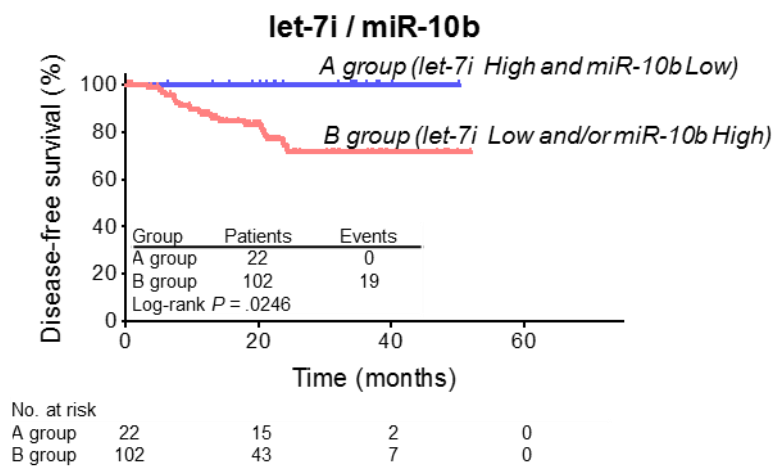

**Supplementary Figure 3:** Kaplan-Meier Overall Survival Analysis based on miR-885-5p in pCRC Tissue Cohort.

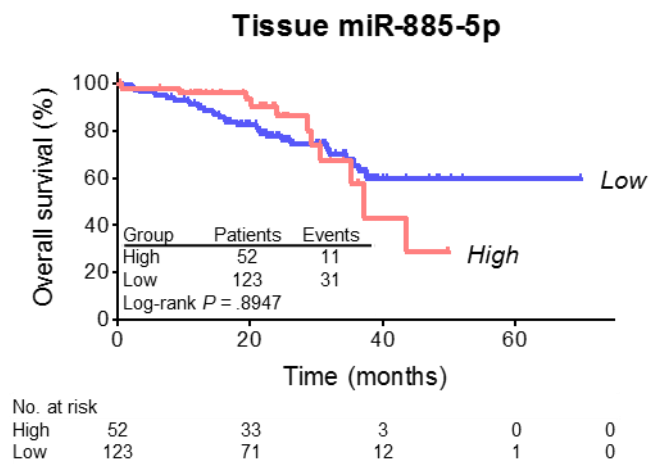

**Supplementary Table 1: Characteristics of All Patients from each CRC Cohorts**

|                                 | NanoString<br>discovery cohort | NanoString<br>validation cohort | Microarray<br>cohort                             | CRC tissue<br>cohort                              | CRC serum<br>cohort                               |
|---------------------------------|--------------------------------|---------------------------------|--------------------------------------------------|---------------------------------------------------|---------------------------------------------------|
| Characteristics                 | Patients <i>n</i> =9           | Patients <i>n</i> =58           | Patients <i>n</i> =84<br>(Deceased <i>n</i> =36) | Patients <i>n</i> =175<br>(Deceased <i>n</i> =42) | Patients <i>n</i> =169<br>(Deceased <i>n</i> =35) |
| <b>Age, years</b>               |                                |                                 |                                                  |                                                   |                                                   |
| < 40                            | 1                              | 1                               | 1                                                | 2                                                 | 3                                                 |
| 40-49                           | 1                              | 6                               | 6                                                | 10                                                | 8                                                 |
| 50-59                           | 2                              | 12                              | 22                                               | 19                                                | 18                                                |
| 60-69                           | 3                              | 26                              | 24                                               | 66                                                | 61                                                |
| ≥ 70                            | 2                              | 13                              | 31                                               | 78                                                | 78                                                |
| mean±SD                         | 59.3±13.6                      | 62.3±10.3                       | 64.6±10.7                                        | 67.5±10.3                                         | 67.8±10.6                                         |
| median (max-min)                | 60.0 (37-78)                   | 64 (32-88)                      | 66.5 (32-87)                                     | 68.0 (37-92)                                      | 68.0 (34-92)                                      |
| <b>Sex</b>                      |                                |                                 |                                                  |                                                   |                                                   |
| Male                            | 4                              | 32                              | 66                                               | 102                                               | 96                                                |
| Female                          | 5                              | 26                              | 18                                               | 73                                                | 73                                                |
| <b>Adenocarcinoma histology</b> |                                |                                 |                                                  |                                                   |                                                   |
| Adenocarcinoma*                 | -                              | 58                              | 75                                               | 162                                               | 152                                               |
| Mucinous                        | -                              | 0                               | 8                                                | 10                                                | 10                                                |
| <b>Tumor location</b>           |                                |                                 |                                                  |                                                   |                                                   |
| Proximal                        | -                              | 12                              | 34                                               | 58                                                | 54                                                |
| Distal                          | -                              | 18                              | 48                                               | 49                                                | 44                                                |
| Rectum                          | -                              | 28                              |                                                  | 68                                                | 71                                                |
| <b>TNM stage</b>                |                                |                                 |                                                  |                                                   |                                                   |
| I                               | 0                              | 0                               | 8                                                | 38                                                | 37                                                |
| II                              | 0                              | 7                               | 29                                               | 53                                                | 58                                                |
| III                             | 0                              | 17                              | 36                                               | 44                                                | 42                                                |
| IV                              | 9                              | 34                              | 10                                               | 40                                                | 30                                                |

\* Adenocarcinoma includes well, moderately, and poorly differentiated.

**Supplementary Table 2: Clinical Relevance (normalized expression) of 4 miRNAs (let-7i, miR-10b, miR-221, and miR-320a) in the miRNA Microarray Cohort (84 pairs of frozen pCRC and adjacent non-tumor tissues; One-way ANOVA Test)**

|                    | hsa-let-7i |                         |                | hsa-miR-10b |                         |                | hsa-miR-221 |                         |                | hsa-miR-320a |                         |                |
|--------------------|------------|-------------------------|----------------|-------------|-------------------------|----------------|-------------|-------------------------|----------------|--------------|-------------------------|----------------|
|                    | <i>n</i>   | <i>mean</i> ± <i>SD</i> | <i>P value</i> | <i>n</i>    | <i>mean</i> ± <i>SD</i> | <i>P value</i> | <i>n</i>    | <i>mean</i> ± <i>SD</i> | <i>P value</i> | <i>n</i>     | <i>mean</i> ± <i>SD</i> | <i>P value</i> |
| <b>Sex</b>         |            |                         | 0.18           |             |                         | 0.579          |             |                         | 0.629          |              |                         | 0.085          |
| Male               | 66         | 0.02407±0.2635          |                | 65          | -0.3092±1.1328          |                | 66          | 0.2713±0.8388           |                | 66           | 0.04704±0.3012          |                |
| Female             | 18         | -0.06910±0.2418         |                | 18          | -0.4715±0.9354          |                | 18          | 0.3753±0.6618           |                | 18           | -0.10260±0.3935         |                |
| <b>Age (Years)</b> |            |                         | 0.729          |             |                         | 0.984          |             |                         | 0.796          |              |                         | 0.856          |
| ≤50                | 7          | -0.028790±0.2321        |                | 7           | -0.3526±1.0560          |                | 7           | 0.3691±0.7193           |                | 7            | 0.03658±0.1627          |                |
| >50                | 77         | 0.007094±0.2641         |                | 76          | -0.3436±1.0995          |                | 77          | 0.2867±0.8126           |                | 77           | 0.01302±0.3380          |                |
| <b>T stage</b>     |            |                         | 0.616          |             |                         | 0.279          |             |                         | 0.815          |              |                         | <b>0.015</b>   |
| T1                 | 0          | -                       |                | 0           | -                       |                | 0           | -                       |                | 0            | -                       |                |
| T2                 | 12         | 0.071440±0.2190         |                | 12          | -0.8053±1.0168          |                | 12          | 0.3131±0.7537           |                | 12           | 0.09735±0.2206          |                |
| T3                 | 67         | -0.005201±0.2716        |                | 66          | -0.2572±1.1060          |                | 67          | 0.2738±0.7934           |                | 67           | 0.02956±0.3294          |                |
| T4                 | 5          | -0.032800±0.2058        |                | 5           | -0.3897±0.9246          |                | 5           | 0.5115±1.1478           |                | 5            | -0.37810±0.2654         |                |
| <b>N stage</b>     |            |                         | 0.44           |             |                         | 0.175          |             |                         | 0.136          |              |                         | 0.587          |
| N0                 | 38         | 0.03021±0.2648          |                | 38          | -0.5572±1.2224          |                | 38          | 0.1865±0.7953           |                | 38           | 0.06200±0.2960          |                |
| N1                 | 34         | -0.01718±0.2761         |                | 33          | -0.2638±0.9682          |                | 34          | 0.2464±0.7730           |                | 34           | -0.03233±0.3229         |                |
| N2                 | 10         | -0.06630±0.1928         |                | 10          | 0.2659±0.7966           |                | 10          | 0.8431±0.7864           |                | 10           | -0.02785±0.4452         |                |
| N3                 | 2          | 0.22200±0.01820         |                | 2           | -0.6827±0.6934          |                | 2           | 0.3823±1.0487           |                | 2            | 0.14000±0.4133          |                |
| <b>M stage</b>     |            |                         | <b>0.01</b>    |             |                         | <b>0.02</b>    |             |                         | 0.121          |              |                         | 0.066          |
| M0                 | 74         | 0.03081±0.2563          |                | 73          | -0.4470±1.0561          |                | 74          | 0.2436±0.7895           |                | 74           | 0.03904±0.3240          |                |
| M1                 | 10         | -0.19350±0.2090         |                | 10          | 0.4043±1.0896           |                | 10          | 0.6632±0.8350           |                | 10           | -0.16300±0.3022         |                |
| <b>TNM stage</b>   |            |                         | 0.073          |             |                         | <b>0.032</b>   |             |                         | 0.418          |              |                         | 0.201          |
| I                  | 8          | 0.08200±0.2585          |                | 8           | -1.0788±1.1221          |                | 8           | 0.1901±0.8263           |                | 8            | 0.1268000±0.2359        |                |
| II                 | 29         | 0.02817±0.2658          |                | 29          | -0.4334±1.2465          |                | 29          | 0.1778±0.8144           |                | 29           | 0.0640100±0.2979        |                |
| III                | 37         | 0.02180±0.2541          |                | 36          | -0.3174±0.8312          |                | 37          | 0.3067±0.7792           |                | 37           | 0.0004827±0.3596        |                |
| IV                 | 10         | -0.19350±0.2090         |                | 10          | 0.4043±1.0896           |                | 10          | 0.6632±0.8350           |                | 10           | -0.1630000±0.3022       |                |

**Supplementary Table 3: Interaction P tests between tumor suppressor-miRNAs (let-7i and miR-320a) as well as oncogenic-miRNAs (miR-10b and miR-221) in miRNA microarray discovery cohort.**

| Variable           | <i>Tumor suppressor-miRNAs</i><br>(let-7i and miR-320a) | <i>Oncogenic-miRNAs</i><br>(miR-10b and miR-221) |
|--------------------|---------------------------------------------------------|--------------------------------------------------|
|                    | $P_{\text{interaction}}$                                | $P_{\text{interaction}}$                         |
| Overall survival   | 0.3927                                                  | 0.3537                                           |
| Distant metastasis | 0.3011                                                  | 0.187                                            |



**Supplementary Table 4: Clinical Relevance (normalized expression) of 3 miRNAs (let-7i, miR-10b, and miR-885-5p) in CRC Tissue Cohort (175 FFPE pCRC tissues; Kruskal-Wallis Test)**

|                    | hsa-let-7i |                |                   | hsa-miR-10b |                 |                | hsa-miR-885-5p |                     |                |
|--------------------|------------|----------------|-------------------|-------------|-----------------|----------------|----------------|---------------------|----------------|
|                    | <i>n</i>   | <i>mean±SD</i> | <i>P value</i>    | <i>n</i>    | <i>mean±SD</i>  | <i>P value</i> | <i>n</i>       | <i>mean±SD</i>      | <i>P value</i> |
| <b>Sex</b>         |            |                | 0.9441            |             |                 | 0.1311         |                |                     | 0.5311         |
| Male               | 102        | 0.7862±0.2881  |                   | 102         | 0.05870±0.02865 |                | 102            | 0.0006554±0.0007500 |                |
| Female             | 73         | 0.7956±0.2960  |                   | 73          | 0.05391±0.03159 |                | 73             | 0.0005863±0.0004942 |                |
| <b>Age (Years)</b> |            |                | 0.6466            |             |                 | 0.5857         |                |                     | 0.4619         |
| ≤68                | 86         | 0.7938±0.2804  |                   | 86          | 0.05588±0.03143 |                | 86             | 0.0005798±0.0004904 |                |
| >68                | 89         | 0.7875±0.3012  |                   | 89          | 0.05734±0.02864 |                | 89             | 0.0006717±0.0007817 |                |
| <b>T stage</b>     |            |                | 0.6927            |             |                 | <b>0.0183</b>  |                |                     | 0.3976         |
| T1/T2              | 50         | 0.7441±0.1990  |                   | 50          | 0.04823±0.02788 |                | 50             | 0.0005246±0.0003865 |                |
| T3/T4              | 125        | 0.8081±0.3183  |                   | 125         | 0.06036±0.02983 |                | 125            | 0.0006675±0.0007339 |                |
| <b>N stage</b>     |            |                | <b>0.0407</b>     |             |                 | 0.6505         |                |                     | 0.3597         |
| N0                 | 95         | 0.8375±0.3025  |                   | 95          | 0.05571±0.03017 |                | 95             | 0.0006975±0.0008064 |                |
| N1/N2/N3           | 80         | 0.7235±0.2608  |                   | 80          | 0.05808±0.02981 |                | 80             | 0.0005445±0.0003985 |                |
| <b>M stage</b>     |            |                | <b>&lt;0.0001</b> |             |                 | <b>0.0486</b>  |                |                     | 0.3175         |
| M0                 | 135        | 0.8517±0.3013  |                   | 135         | 0.05443±0.02938 |                | 135            | 0.0006501±0.0006979 |                |
| M1                 | 40         | 0.6133±0.1562  |                   | 40          | 0.06701±0.03105 |                | 40             | 0.0005515±0.0004856 |                |
| <b>TNM stage</b>   |            |                | <b>0.0002</b>     |             |                 | <b>0.0208</b>  |                |                     | 0.7954         |
| I                  | 38         | 0.7513±0.2090  |                   | 38          | 0.04884±0.03021 |                | 38             | 0.0005713±0.0004014 |                |
| II                 | 53         | 0.8889±0.3261  |                   | 53          | 0.06255±0.03029 |                | 53             | 0.0007243±0.0009604 |                |
| III                | 44         | 0.8896±0.3245  |                   | 44          | 0.05029±0.02540 |                | 44             | 0.0006289±0.0005012 |                |
| IV                 | 40         | 0.6133±0.1562  |                   | 40          | 0.06701±0.03105 |                | 40             | 0.0005515±0.0004856 |                |

**Supplementary Table 5: Clinical Relevance of Tissue- and Serum-miR-885-5p Expression in Matched CRC Tissue and Serum Cohorts (175 FFPE pCRC tissues and 169 sera)\***

|                           | Tissue miR-885-5p |                  |                             | Serum miR-885-5p |                  |                             |
|---------------------------|-------------------|------------------|-----------------------------|------------------|------------------|-----------------------------|
|                           | Low<br>(n = 123)  | High<br>(n = 52) | P value<br>( $\chi^2$ test) | Low<br>(n = 94)  | High<br>(n = 75) | P value<br>( $\chi^2$ test) |
| <b>Sex</b>                |                   |                  | 0.4623                      |                  |                  | 0.5533                      |
| Male                      | 69                | 33               |                             | 51               | 45               |                             |
| Female                    | 54                | 19               |                             | 43               | 30               |                             |
| <b>Age (Years)</b>        |                   |                  | 0.9857                      |                  |                  | 0.0011                      |
| ≤68                       | 61                | 25               |                             | 34               | 47               |                             |
| >68                       | 62                | 27               |                             | 60               | 28               |                             |
| <b>Histological Grade</b> |                   |                  | 0.2475                      |                  |                  | 0.6393                      |
| well/mod.                 | 110               | 50               |                             | 85               | 66               |                             |
| poor/mucin.               | 13                | 2                |                             | 8                | 9                |                             |
| <b>T stage</b>            |                   |                  | 0.2783                      |                  |                  | 0.0733                      |
| T1/T2                     | 37                | 11               |                             | 31               | 15               |                             |
| T3/T4                     | 84                | 41               |                             | 60               | 59               |                             |
| <b>N stage</b>            |                   |                  | 0.1717                      |                  |                  | <b>0.0327</b>               |
| N0                        | 62                | 33               |                             | 61               | 36               |                             |
| N1/N2/N3                  | 60                | 19               |                             | 31               | 38               |                             |
| <b>M stage</b>            |                   |                  | 0.3921                      |                  |                  | <b>0.0069</b>               |
| M0                        | 92                | 43               |                             | 83               | 54               |                             |
| M1                        | 30                | 9                |                             | 9                | 20               |                             |
| <b>TNM stage</b>          |                   |                  | 0.4479                      |                  |                  | <b>0.0235</b>               |
| I                         | 28                | 10               |                             | 26               | 11               |                             |
| II                        | 33                | 20               |                             | 34               | 24               |                             |
| III                       | 31                | 13               |                             | 23               | 19               |                             |
| IV                        | 30                | 9                |                             | 10               | 20               |                             |
| <b>Liver Metastasis</b>   |                   |                  | 0.473                       |                  |                  | <b>0.0011</b>               |
| Absent                    | 101               | 46               |                             | 89               | 59               |                             |
| Present                   | 21                | 6                |                             | 3                | 15               |                             |
| <b>Lymphatic Invasion</b> |                   |                  | 0.8579                      |                  |                  | <b>0.0141</b>               |
| Absent                    | 25                | 12               |                             | 30               | 11               |                             |
| Present                   | 97                | 40               |                             | 62               | 63               |                             |

\*All statistical tests were two-sided.

**Supplementary Table 6: Interaction tests between tissue miR-885-5p and serum miR-885-5p in the matched CRC Tissue and Serum cohorts.**

| <i>Tissue-miR-885-5p and Serum-miR-885-5p</i> |                          |
|-----------------------------------------------|--------------------------|
| Variable                                      | $P_{\text{interaction}}$ |
| Overall survival                              | 0.2315                   |
| Lymph node metastasis                         | 0.7469                   |
| Distant metastasis                            | 0.3128                   |

**Supplementary References**

- 1.Schetter AJ, Leung SY, Sohn JJ, *et al.* MicroRNA expression profiles associated with prognosis and therapeutic outcome in colon adenocarcinoma. *JAMA* 2008;299(4):425-36.
- 2.Hur K, Cejas P, Feliu J, *et al.* Hypomethylation of long interspersed nuclear element-1 (LINE-1) leads to activation of proto-oncogenes in human colorectal cancer metastasis. *Gut* 2014;63(4):635-46.
- 3.Hur K, Toiyama Y, Takahashi M, *et al.* MicroRNA-200c modulates epithelial-to-mesenchymal transition (EMT) in human colorectal cancer metastasis. *Gut* 2013;62(9):1315-26.
- 4.Hur K, Han TS, Jung EJ, *et al.* Up-regulated expression of sulfatases (SULF1 and SULF2) as prognostic and metastasis predictive markers in human gastric cancer. *J Pathol* 2012;228(1):88-98.
- 5.Toiyama Y, Takahashi M, Hur K, *et al.* Serum miR-21 as a diagnostic and prognostic biomarker in colorectal cancer. *J Natl Cancer Inst* 2013;105(12):849-59.
- 6.O'Brien PC. Procedures for comparing samples with multiple endpoints. *Biometrics* 1984;40(4):1079-87.
- 7.Ruopp MD, Perkins NJ, Whitcomb BW, *et al.* Youden Index and optimal cut-point estimated from observations affected by a lower limit of detection. *Biom J* 2008;50(3):419-30.
